# Supplementary material
Source: PubMed Central journal article supplement (PMC4148800)

### Supplemental Figure 1. Visualisation of bacterial community structure of the kakapo and hoatzin hindgut microbiota.

Unweighted Pair Group Method with Arithmetic Mean clustering of kakapo and hoatzin hindgut microbiota based on phylotyping community data at the class (left) and genus (right) level. Distances were calculated using the Jaccard index using data obtained from [Godoy-Vitorino et al. (2012) *ISME J* 6, 531-541]. Hoatzin sample is bolded and appeared to cluster with the Juvenile\_Fourth and Adult\_Second samples, rather than clustering away from kakapo communities.

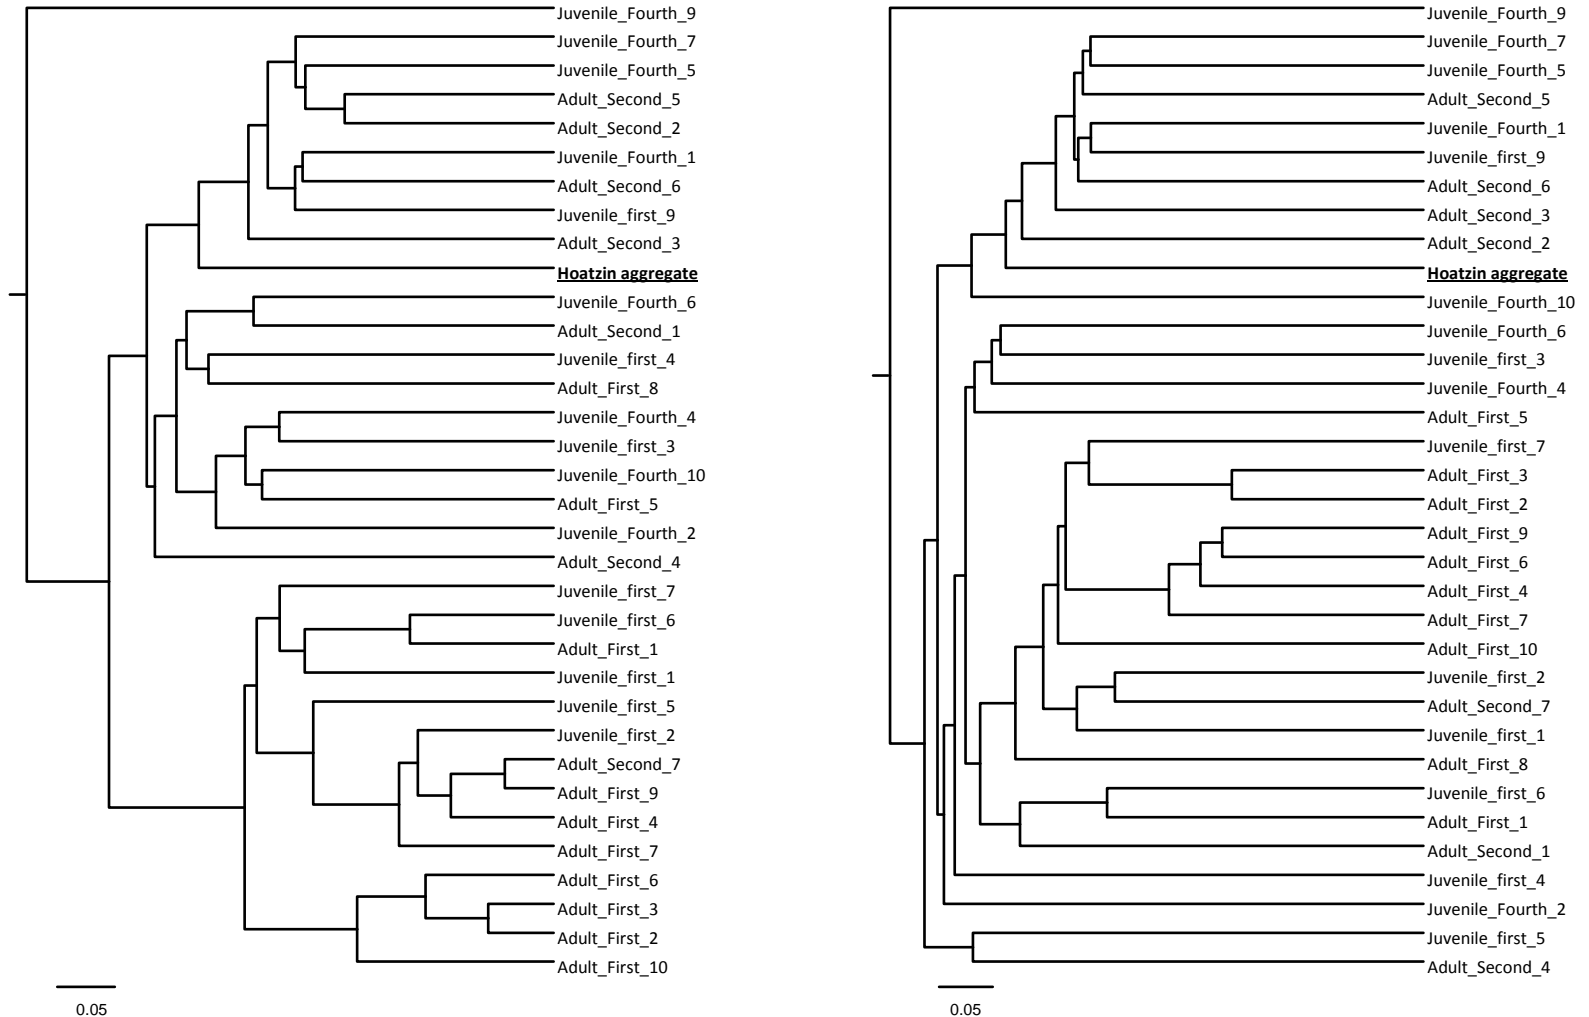

Supplement: AEM.00975-14_zam999105522so1.pdf [file AEM.00975-14_zam999105522so1.pdf]
